# Supplementary material
Source: Springer Nature journal article supplement (https://www.springermedizin.de/resource/supplementary/10194_2014_643_MOESM1_ESM.pdf/9423342)

### Scope and purpose

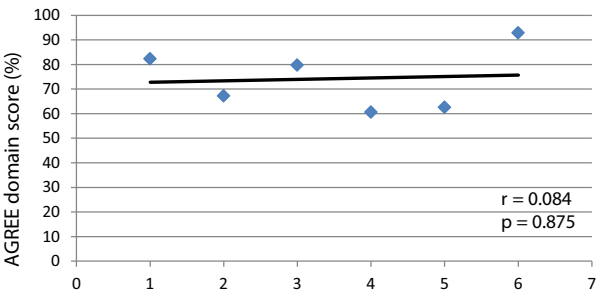

### Stakeholder involvement

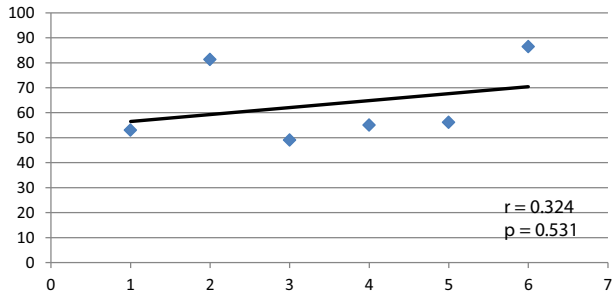

### Rigour of development

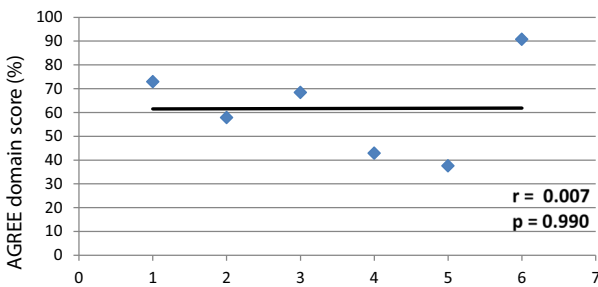

### Clarity and presentation

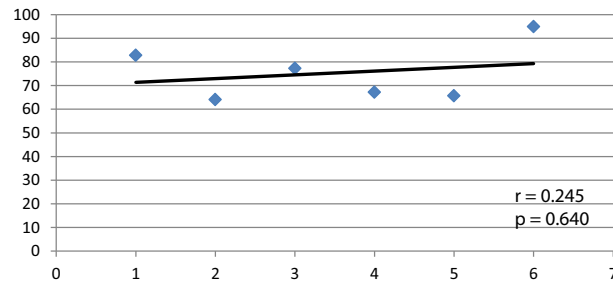

### Applicability

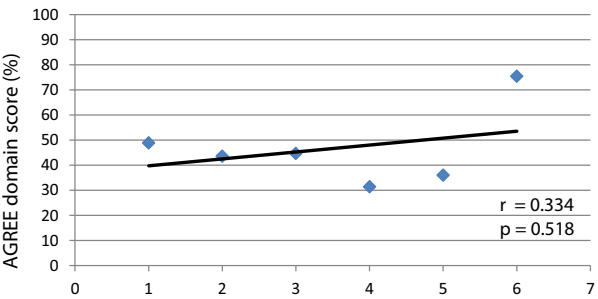

### Editorial independence

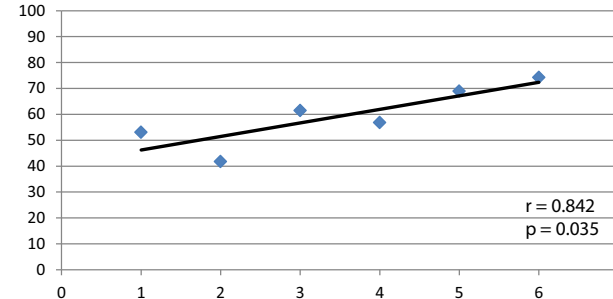

Supplement: MOESM1 [file 9423342]
